# Supplementary material
Source: PubMed Central journal article supplement (PMC4567645)

Figure S1 BLI assessment of Cdt holotoxin binding to LUVs. LUVs containing PE-biotin were immobilized on streptavidin sensors and Cdt holotoxin served as the analyte. A representative BLI sensorgram is shown for the interaction of varying concentrations of Cdt holotoxin with LUVs containing 20% cholesterol; the experimental line (black) is shown along with the model fit (red line). The  $K_D$  value was determined to be  $2.03 \times 10^{-6}$  M.

Figure S1

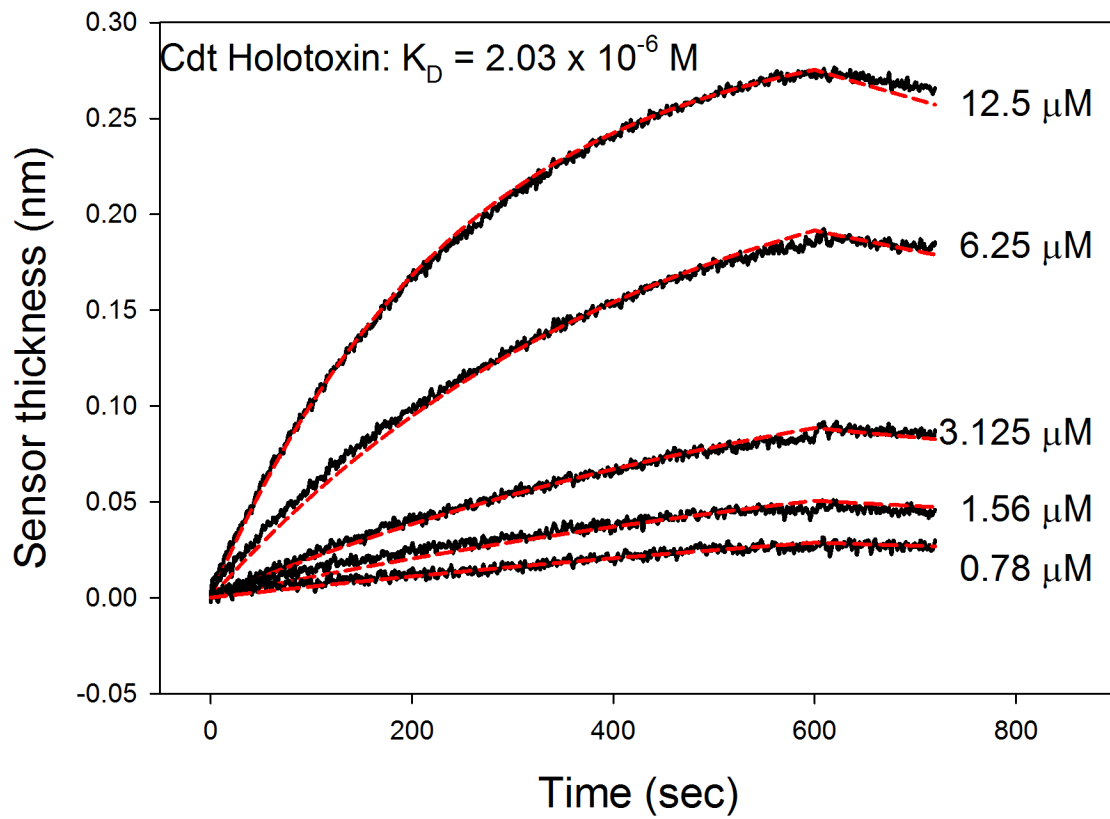

Supplement: IAI.00788-15_zii999091421so1.pdf [file IAI.00788-15_zii999091421so1.pdf]
