# Supplementary material
Source: PubMed Central journal article supplement (PMC4567645)

Figure S2 CD analysis of CdtB<sup>WT</sup> and mutants. CD-data was collected on an Applied Photophysics Chirascan CD spectrometer at 25°C in a 1 mm quartz cuvette. Data was collected in 0.5 nm increments from 195-260 nm in 20 mM Sodium phosphate buffer, pH 7.4. The concentration was 100 µg/ml for CdtB<sup>WT</sup>, CdtB<sup>V104P</sup>, CdtB<sup>Y105P</sup>, CdtB<sup>R110P</sup>, and 50 µg/ml for CdtB<sup>Y107P</sup>. All spectra are an average of three separate scans. None of the mutations had any effect on the secondary structure of CdtB

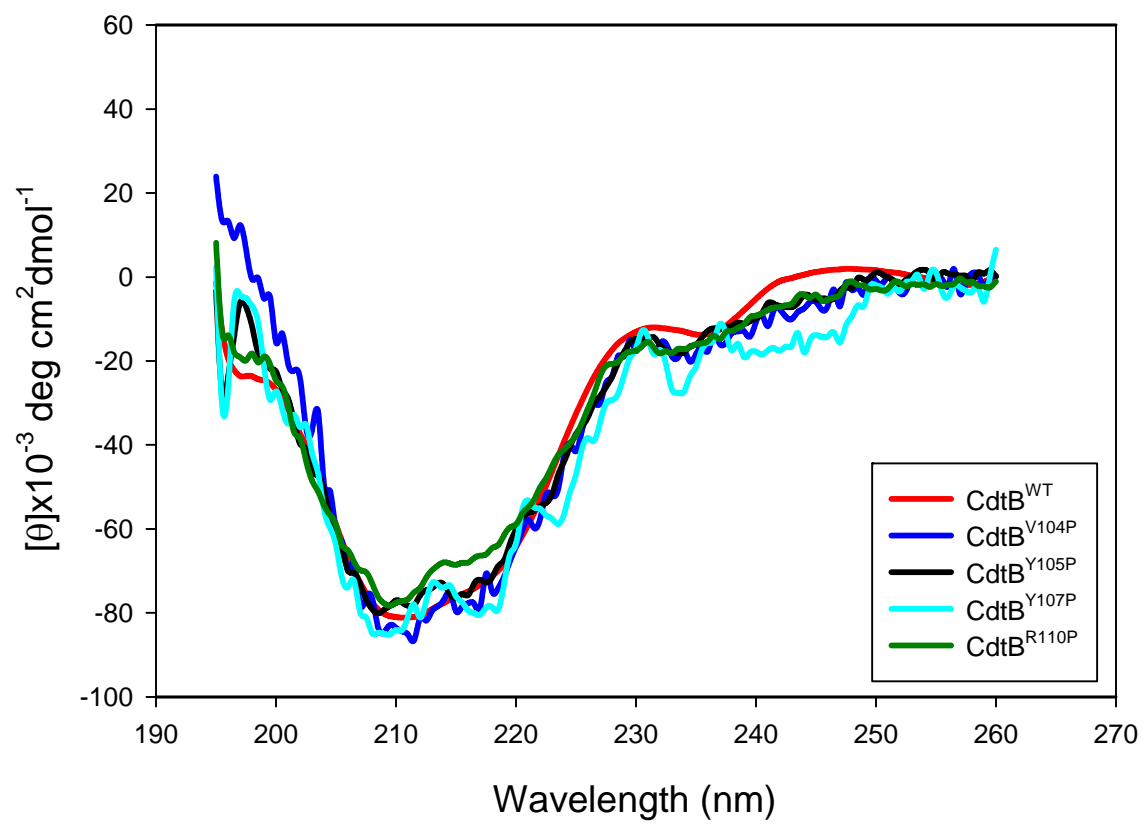

Supplement: IAI.00788-15_zii999091421so2.pdf [file IAI.00788-15_zii999091421so2.pdf]
